# Supplementary material
Source: bioRxiv or medRxiv preprint supplement (https://www.biorxiv.org/highwire/filestream/85400/field_highwire_adjunct_files/1/277400-2.pdf)
Supplement: Supplementary file [file 277400-2.pdf]

## Indicative Group B formation protein from randomForest analysis

>xylosus\_00489

MADKKFPKDAMRVLKETSRTFYIPITFLEKELKHTVASAYLVLR  
AIDEIEDHEALSNDMKYNTLMQISELFKETFDEDKYLQILAPVKNDMPEVTIRLGEWI  
DACPEHTRAVVLEASSEMAYGMAKWAKANWDIHTKADLDDYTTYVAGLVGVMLSQLWD  
LCAGVKTDRLAIGYGRGLQAVNILRNQHEDYEERGVSFVPDDWDRDDLFEYAEDNLA  
KADAYMKDINKKTILLFCRLPLALAHKSLKAMQNGREKISRSEVEETVEEIQKD
